# Supplementary material for: Petrogenesis of Early Paleozoic I-type granitoids in the Longshoushan and implications for the tectonic affinity and evolution of the southwestern Alxa Block
Source: Copernicus journal article supplement (doi:10.5194/egusphere-2024-1145), 2024-06-26
Supplement: Supplementary file 1 [file Figure S1.docx]

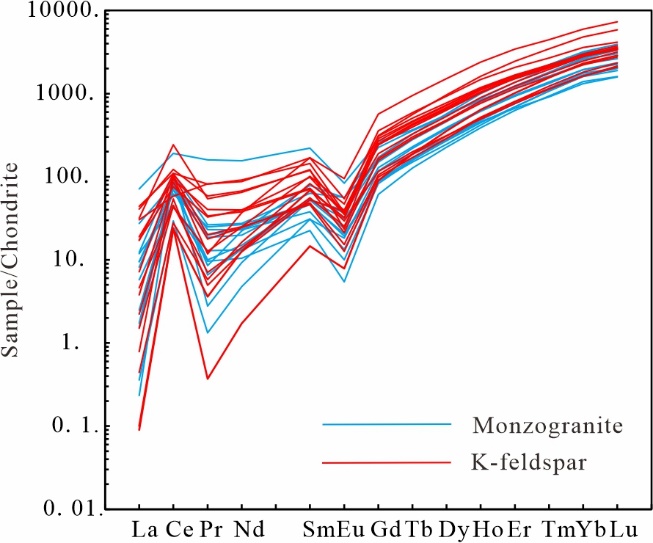


Fig. S1. Chondrite-normalized REE patterns of zircon (chondrite values are from Sun and McDonough, 1989).

Sun, S.S., and Mcdonough, W.F.: Chemical and isotopic systematics of oceanic basalts: implications for mantle composition and processes, Geol. Soc. Lond. Spec. Publ., 42, 313-345, https://doi.org/10.1144/GSL.SP.1989.042.01.19, 1989.
