# Supplementary material for: Petrogenesis of Early Paleozoic I-type granitoids in the Longshoushan and implications for the tectonic affinity and evolution of the southwestern Alxa Block
Source: Copernicus journal article supplement (doi:10.5194/egusphere-2024-1145), 2024-06-26
Supplement: Supplementary file 2 [file Table S1.xls]

## Sheet: References for Figure 2
References for Figure 2
(1) Leng, T.C., Liu, W.H., Wang, W., Yu, C.D., Liu, X.D., Li, Y.X., 2021.Discussion on geochemical characteristics and genesis of Hongshiquan syenite in Longshoushan area gansu province. Mineralogy and Petrology 41, 72-83(in Chinese with English abstract).
(2) Wang. K.X., Yu, C.D., Yan, J.,Liu, X.D., Liu, W.H., Pan, J.Y., 2019. Petrogenesis of earlySilurian granitoids in the Longshoushan area and their implications for the extensional environment of the North Qilian Orogenic Belt, China, Lithos 342-343, 152-174.
(3) Zhang, L.Q., 2019. Post-collisional magmatism and geodynamic process from the North Qilian orogen to Southern margin of the Alxa block.Wuhan, NW China. China University of Geosciences(in Chinese with English abstract).
(4) Tang, L., 2015. Granites’characteristics and zircon LA-ICP-MS U-Pb dating of Jiling area in Longshoushan, Gansu Province. Master: East China Institute of Technology (in Chinese with English abstract).
(5) Zhang, Z.Q., Wang, K.X., Wang, G., Liu, X.D., Liu, W.H., Wu, B., 2018. Petrogenesis and tectonic significances of the Paleozoic Jiling Syenite in the Mountain Longshou area, Gansu province. Geological Review 64,1017-29(in Chinese with English abstract)..
(6) Zhang, J.M., Zhao, R.Y., Wang, G., Nie, L., 2017. Thegeological characteristics and significances of A-type porphyritic granite in the Jiling uranium deposit in the Longshou mountains,Gansu Province.Bulletin of Mineralogy,Petrology and Geochemistry 36, 813-823(in Chinese with English abstract).
(7) Chen, Y.J., Zhao, R.Y., Wang, G., Rong, X., Li, T., 2020. Geochronology, Geochemical Characteristics and Significances of Quartz Monzonite in Niujiaogou,Longshoushan,Gansu. Journal of East China University of Technology(Natural Science) 43, 21-29(in Chinese with English abstract).
(8) Zhao, R.Y., Wang, B., Chen, Y.C., Chen, Y.J., Rong, X., Wang, G., Li, T., 2018. On Potassium-sodium Mixed Metasomatism of the Niujiaogou Uranium Occurrence in Longshou Mountain, Gansu Province. Acta Geologica Sinica 92, 2469-2484(in Chinese with English abstract).
(9) Liu, W.H., Pan, J.Y., Liu, X.D., Wang, K.X., Wang, G., X, P., 2019. Petrogenesis and tectonic implication of QingShanBao pluton in Longshoushan GanSu: Constraints from elemental geochemistry, zircon U-Pb age, and Sr-Nd isotopes. Mineralogy and Petrology 39, 26-40.
(10) Zhu, Q.L.,Guo, Z.F.,Wang, S.Y., Chen, J.Y., Qiu, R.G., Zhou, S., 2012. Formation age and geological environment of monzonitic granite from Qingshanpu pluton on the eastern margin of Longshou, Gansu[J]. IOP Conference Series: Earth and Environmental Science 804.
(11) Duan, J., Qian, Z.Z., Jiao, J.G.,2015. Genesis and tectonic significance of the Xijing mafic rock mass in the Longshoushan rock belt, Gansu. Journal of Jilin University (Earth Science Edition) 45, 832-846(in Chinese with English abstract).
(12) Zeng, R.Y., Lai, J.Q., Mao, X.C., Yan, J., Zhang, C.G., Xiao, W.Z., 2021. Geochemistry and zircon ages of the Yushigou diabase in the Longshoushan area, Alxa Block: implications for crust-mantle interaction and tectonic evolution. Geological Magazine 158.
(13) Zhang, X.X.,Su, S.G., Liu, M.Y.,Wang, W.Z., 2020. Characteristics and tectonic significance of the early Paleozoic syenite granite from Jinchuan,Gansu Province. Earth Science Frontiers 28, 283-298(in Chinese with English abstract).
(14) Zeng, R.Y., Lai, J.Q., Mao, X.C., Li, B., Ju, P.G., Tao, S.L., 2016. Geochemistry, zircon U-Pb dating and Hf isotopies composition of Paleozoic granitoids in Jinchuan, NW China: Constraints on their petrogenesis, source characteristics and tectonic implication. Journal of Asian Earth Sciences 121, 20-33.
(15) Duan, J., Li, C.S., Qian, Z.Z., Jiao, J.G., 2015. Geochronological and geochemical constraints on the petrogenesis and tectonic significance of Paleozoic dolerite dykes in the southern margin of Alxa Block, North China Craton. Journal of Asian Earth Sciences 111, 244-253.
(16) Chen, Y.J., Wang, G., Zhao, R.Y., Yang, K.R., Xiao, Tao., 2021. Zircon U-Pb Age and Geological Significance of Diorite Porphyrite From East Longshoushan, Gansu CHEN Yuniie. Uranium Geology 37, 38-50+111(in Chinese with English abstract)..
(17) He, J.J., Shao, D.,Wang, G., Chen, Y.J., Li, T.S., 2020. Zircon U-Pb dating age,geochemical characteristics and geological significance of Qingshanbu granodiorite in Longshou Mountain area,Gansu. Mineral Resources and Geolog 36, 596-606(in Chinese with English abstract).
(18) Chen, Y.J., Wang, W., Wang, G., Yang, K., He, J.J., Li, T., 2022. Characteristics of Diorite from the Qingshanbao Pluton and Their Relationship with UraniumMineralization in the Longshoushan Metallogenic Belt, Gansu Province. Geology and Exploration 58, 501-513(in Chinese with English abstract)..
(19) Liu, W.H., Spier, C., Niu, Y.B., Liu, X.D., Yan, Jie., Wang, K.X., Pan, J.Y., 2021. Magma mixing in the genesis of the Qingshanbao granitoids in the Longshoushan area: Implications for the tectonic evolution of the North Qilian orogenic belt, NW China. Geological Journal ,56.
(20) Wang, Z.Z.，Chen, X.H.，Shao, Z.G., Li, B.，Ding, W.C.，Zhang, Y.P.，Wang, Y.C.，Zhang, Y.Y., Xu, S.L.，Qin, X., 2020. Petrogenesis of the Late Silurian-Early Devonian granites in the Longshoushan-Helishan area, Gansu Province,and its tectonic implications for the Early Paleozoic evolution of the southwestern Alxa Block. Acta Geologica Sinica 94, 2243-2261(in Chinese with English abstract).
(21) Xue, S., Ling, M.X., Liu, Y.L., Zhang, H., Sun, W.D., 2017. The genesis of early Carboniferous adakitic rocks at the southern margin of the Alxa Block, North China.Lithos: An International Journal of Mineralogy, Petrology, and Geochemistry 278-281, 181-194.
(22) Zeng, R.Y., Lai, J.Q., Mao, X.C., Xiao, W.Z., Yan, J., Zhang,C.D., Hu, J.X., An, Q.X., 2020b. Petrogenesis and tectonic significance of the Early Devonian lamprophyres and diorites in the Alxa Block, NW China. Chemie der Erde-Geochemistry.
(23) Jiao, J.G., Ji, S.J., Ru, H.C., Zhang, G.P., Ning, Q.F., Shao, L., 2017. Petrology, gechemisty and chronology study of the Xiaokouzi maftc-ultramafic intrusion n the eastern section of Longshou Mountains, Gansu.Acta Geologica Sinica 91, 736-747(in Chinese with English abstract).
(24) Hu, N.G., Xu, A.D., Yang, J.X., 2005. Characteristics and tectonic environment of Zhigoumen pluton in Longshoushan area. Earth Sci. Environ 27, 5-11(in Chinese with English abstract).
(25) Zeng et al., unpublished data.

## Sheet: References for Figure 4 and 5
References for Figure 4 and 5
>444 Ma
Zhao, R.Y., Wang, B., Chen, Y.C., Chen, Y.J., Rong, X., Wang, G., Li, T., 2018. On Potassium-sodium Mixed Metasomatism of the Niujiaogou Uranium Occurrence in Longshou Mountain, Gansu Province. Acta Geologica Sinica 92, 2469-2484(in Chinese with English abstract).
Zhang, L.Q., 2019. Post-collisional magmatism and geodynamic process from the North Qilian orogen to Southern margin of the Alxa block.Wuhan, NW China. China University of Geosciences(in Chinese with English abstract).
Chen, Y.J., Zhao, R.Y., Wang, G., Rong, X., Li, T., 2020. Geochronology, Geochemical Characteristics and Significances of Quartz Monzonite in Niujiaogou,Longshoushan,Gansu. Journal of East China University of Technology(Natural Science) 43, 21-29(in Chinese with English abstract).
Zhang, L.Q., Zhang, H.F., Hawkesworth, C., Luo, B.J., Yang, H., 2021. Mafic rocks from the southern Alxa block of Northwest China and its geodynamic evolution in the Paleozoic. Journal of the Geological Society 178.
He, J.J., Shao, D.,Wang, G., Chen, Y.J., Li, T.S., 2020. Zircon U-Pb dating age,geochemical characteristics and geological significance of Qingshanbu granodiorite in Longshou Mountain area,Gansu. Mineral Resources and Geolog 36, 596-606(in Chinese with English abstract).
444-435 Ma:
Liu, W.H., Pan, J.Y., Liu, X.D., Wang, K.X., Wang, G., X, P., 2019. Petrogenesis and tectonic implication of QingShanBao pluton in Longshoushan GanSu: Constraints from elemental geochemistry, zircon U-Pb age, and Sr-Nd isotopes. Mineralogy and Petrology 39, 26-40.
Wang. K.X., Yu, C.D., Yan, J.,Liu, X.D., Liu, W.H., Pan, J.Y., 2019. Petrogenesis of earlySilurian granitoids in the Longshoushan area and their implications for the extensional environment of the North Qilian Orogenic Belt, China, Lithos 342-343, 152-174.
Zhang, L.Q., 2019. Post-collisional magmatism and geodynamic process from the North Qilian orogen to Southern margin of the Alxa block.Wuhan, NW China. China University of Geosciences(in Chinese with English abstract).
Liu, W.H., Spier, C., Niu, Y.B., Liu, X.D., Yan, Jie., Wang, K.X., Pan, J.Y., 2021. Magma mixing in the genesis of the Qingshanbao granitoids in the Longshoushan area: Implications for the tectonic evolution of the North Qilian orogenic belt, NW China. Geological Journal ,56.
Zhu, Q.L.,Guo, Z.F.,Wang, S.Y., Chen, J.Y., Qiu, R.G., Zhou, S., 2012. Formation age and geological environment of monzonitic granite from Qingshanpu pluton on the eastern margin of Longshou, Gansu[J]. IOP Conference Series: Earth and Environmental Science 804.
<435 Ma
Duan, J., Qian, Z.Z., Jiao, J.G., Genesis and tectonic significance of the Xijing mafic rock mass in the Longshoushan rock belt, Gansu. Journal of Jilin University (Earth Science Edition) 45, 832-846(in Chinese with English abstract).
Duan, J., Li, C.S., Qian, Z.Z., Jiao, J.G., 2015. Geochronological and geochemical constraints on the petrogenesis and tectonic significance of Paleozoic dolerite dykes in the southern margin of Alxa Block, North China Craton. Journal of Asian Earth Sciences 111, 244-253.
Tang, L., 2015. Granites’characteristics and zircon LA-ICP-MS U-Pb dating of Jiling area in Longshoushan, Gansu Province. Master: East China Institute of Technology(in Chinese with English abstract)..
Zeng, R.Y., Lai, J.Q., Mao, X.C., Li, B., Ju, P.G., Tao, S.L., 2016. Geochemistry, zircon U-Pb dating and Hf isotopies composition of Paleozoic granitoids in Jinchuan, NW China: Constraints on their petrogenesis, source characteristics and tectonic implication. Journal of Asian Earth Sciences 121, 20-33.
Zhang, Z.Q., Wang, K.X., Wang, G., Liu, X.D., Liu, W.H., Wu, B., 2018. Petrogenesis and tectonic significances of the Paleozoic Jiling Syenite in the Mountain Longshou area, Gansu province. Geological Review 64,1017-29(in Chinese with English abstract)..
Wang, Z.Z.，Chen, X.H.，Shao, Z.G., Li, B.，Ding, W.C.，Zhang, Y.P.，Wang, Y.C.，Zhang, Y.Y., Xu, S.L.，Qin, X., 2020. Petrogenesis of the Late Silurian-Early Devonian granites in the Longshoushan-Helishan area, Gansu Province,and its tectonic implications for the Early Paleozoic evolution of the southwestern Alxa Block. Acta Geologica Sinica 94, 2243-2261(in Chinese with English abstract).
Chen, Y.J., Wang, G., Zhao, R.Y., Yang, K.R., Xiao, Tao., 2021. Zircon U-Pb Age and Geological Significance of Diorite Porphyrite From East Longshoushan, Gansu CHEN Yuniie. Uranium Geology 37, 38-50+111(in Chinese with English abstract)..
Leng, T.C., Liu, W.H., Wang, W., Yu, C.D., Liu, X.D., Li, Y.X., 2021.Discussion on geochemical characteristics and genesis of Hongshiquan syenite in Longshoushan area gansu province. Mineralogy and Petrology 41, 72-83(in Chinese with English abstract).
Zeng, R.Y., Lai, J.Q., Mao, X.C., Yan, J., Zhang, C.G., Xiao, W.Z., 2021. Geochemistry and zircon ages of the Yushigou diabase in the Longshoushan area, Alxa Block: implications for crust-mantle interaction and tectonic evolution. Geological Magazine 158.
Chen, Y.J., Wang, W., Wang, G., Yang, K., He, J.J., Li, T., 2022. Characteristics of Diorite from the Qingshanbao Pluton and Their Relationship with UraniumMineralization in the Longshoushan Metallogenic Belt, Gansu Province. Geology and Exploration 58, 501-513(in Chinese with English abstract)..
Chen, Y.J., Wang, G., Wang, W., He, J.J., Li, X.C., Zhang, C., Guo, B.J., 2022. Geological Characteristics and Significance of Middle-coarse Grain Granites in Jiling Area ofLongshoushan.Uranium Geology 38, 1111-1121(in Chinese with English abstract).
Zhang, X.X.,Su, S.G., Liu, M.Y.,Wang, W.Z., 2020. Characteristics and tectonic significance of the early Paleozoic syenite granite from Jinchuan,Gansu Province. Earth Science Frontiers 28, 283-298(in Chinese with English abstract).

## Sheet: References for Figure 7
References for Figure 7
Duan, J., Qian, Z.Z., Jiao, J.G., Genesis and tectonic significance of the Xijing mafic rock mass in the Longshoushan rock belt, Gansu. Journal of Jilin University (Earth Science Edition) 45, 832-846(in Chinese with English abstract).
Duan, J., Li, C.S., Qian, Z.Z., Jiao, J.G., 2015. Geochronological and geochemical constraints on the petrogenesis and tectonic significance of Paleozoic dolerite dykes in the southern margin of Alxa Block, North China Craton. Journal of Asian Earth Sciences 111, 244-253.
Tang, L., 2015. Granites’characteristics and zircon LA-ICP-MS U-Pb dating of Jiling area in Longshoushan, Gansu Province. Master: East China Institute of Technology(in Chinese with English abstract)..
Zeng, R.Y., Lai, J.Q., Mao, X.C., Li, B., Ju, P.G., Tao, S.L., 2016. Geochemistry, zircon U-Pb dating and Hf isotopies composition of Paleozoic granitoids in Jinchuan, NW China: Constraints on their petrogenesis, source characteristics and tectonic implication. Journal of Asian Earth Sciences 121, 20-33.
Zhang, J.M., Zhao, R.Y., Wang, G., Nie, L., 2017. Thegeological characteristics and significances of A-type porphyritic granite in the Jiling uranium deposit in the Longshou mountains,Gansu Province.Bulletin of Mineralogy,Petrology and Geochemistry 36, 813-823(in Chinese with English abstract).
Zhao, R.Y., Wang, B., Chen, Y.C., Chen, Y.J., Rong, X., Wang, G., Li, T., 2018. On Potassium-sodium Mixed Metasomatism of the Niujiaogou Uranium Occurrence in Longshou Mountain, Gansu Province. Acta Geologica Sinica 92, 2469-2484(in Chinese with English abstract).
Zhang, Z.Q., Wang, K.X., Wang, G., Liu, X.D., Liu, W.H., Wu, B., 2018. Petrogenesis and tectonic significances of the Paleozoic Jiling Syenite in the Mountain Longshou area, Gansu province. Geological Review 64,1017-29(in Chinese with English abstract)..
Liu, W.H., Pan, J.Y., Liu, X.D., Wang, K.X., Wang, G., X, P., 2019. Petrogenesis and tectonic implication of QingShanBao pluton in Longshoushan GanSu: Constraints from elemental geochemistry, zircon U-Pb age, and Sr-Nd isotopes. Mineralogy and Petrology 39, 26-40.
Wang. K.X., Yu, C.D., Yan, J.,Liu, X.D., Liu, W.H., Pan, J.Y., 2019. Petrogenesis of earlySilurian granitoids in the Longshoushan area and their implications for the extensional environment of the North Qilian Orogenic Belt, China, Lithos 342-343, 152-174.
Zhang, L.Q., Zhang, H.F., Hawkesworth, C., Luo, B.J., Yang, H., 2019. Mafic rocks from the southern Alxa block of Northwest China and its geodynamic evolution in the Paleozoic. Journal of the Geological Society 178.
Chen, Y.J., Zhao, R.Y., Wang, G., Rong, X., Li, T., 2020. Geochronology, Geochemical Characteristics and Significances of Quartz Monzonite in Niujiaogou,Longshoushan,Gansu. Journal of East China University of Technology(Natural Science) 43, 21-29(in Chinese with English abstract).
Wang, Z.Z.，Chen, X.H.，Shao, Z.G., Li, B.，Ding, W.C.，Zhang, Y.P.，Wang, Y.C.，Zhang, Y.Y., Xu, S.L.，Qin, X., 2020. Petrogenesis of the Late Silurian-Early Devonian granites in the Longshoushan-Helishan area, Gansu Province,and its tectonic implications for the Early Paleozoic evolution of the southwestern Alxa Block. Acta Geologica Sinica 94, 2243-2261(in Chinese with English abstract).
Chen, Y.J., Wang, G., Zhao, R.Y., Yang, K.R., Xiao, Tao., 2021. Zircon U-Pb Age and Geological Significance of Diorite Porphyrite From East Longshoushan, Gansu CHEN Yuniie. Uranium Geology 37, 38-50+111(in Chinese with English abstract)..
Liu, W.H., Spier, C., Niu, Y.B., Liu, X.D., Yan, Jie., Wang, K.X., Pan, J.Y., 2021. Magma mixing in the genesis of the Qingshanbao granitoids in the Longshoushan area: Implications for the tectonic evolution of the North Qilian orogenic belt, NW China. Geological Journal ,56.
Leng, T.C., Liu, W.H., Wang, W., Yu, C.D., Liu, X.D., Li, Y.X., 2021.Discussion on geochemical characteristics and genesis of Hongshiquan syenite in Longshoushan area gansu province. Mineralogy and Petrology 41, 72-83(in Chinese with English abstract).
Zhang, X.X.,Su, S.G., Liu, M.Y.,Wang, W.Z., 2020. Characteristics and tectonic significance of the early Paleozoic syenite granite from Jinchuan,Gansu Province. Earth Science Frontiers 28, 283-298(in Chinese with English abstract).
Zhu, Q.L.,Guo, Z.F.,Wang, S.Y., Chen, J.Y., Qiu, R.G., Zhou, S., 2012. Formation age and geological environment of monzonitic granite from Qingshanpu pluton on the eastern margin of Longshou, Gansu[J]. IOP Conference Series: Earth and Environmental Science 804.
Zeng, R.Y., Lai, J.Q., Mao, X.C., Yan, J., Zhang, C.G., Xiao, W.Z., 2021. Geochemistry and zircon ages of the Yushigou diabase in the Longshoushan area, Alxa Block: implications for crust-mantle interaction and tectonic evolution. Geological Magazine 158.
Chen, Y.J., Wang, W., Wang, G., Yang, K., He, J.J., Li, T., 2022. Characteristics of Diorite from the Qingshanbao Pluton and Their Relationship with UraniumMineralization in the Longshoushan Metallogenic Belt, Gansu Province. Geology and Exploration 58, 501-513(in Chinese with English abstract).
Chen, Y.J., Wang, G., Wang, W., He, J.J., Li, X.C., Zhang, C., Guo, B.J., 2022. Geological Characteristics and Significance of Middle-coarse Grain Granites in Jiling Area ofLongshoushan.Uranium Geology 38, 1111-1121(in Chinese with English abstract).
He, J.J., Shao, D.,Wang, G., Chen, Y.J., Li, T.S., 2020. Zircon U-Pb dating age,geochemical characteristics and geological significance of Qingshanbu granodiorite in Longshou Mountain area,Gansu. Mineral Resources and Geolog 36, 596-606(in Chinese with English abstract).
Zhang, X.X.,Su, S.G., Liu, M.Y.,Wang, W.Z., 2020. Characteristics and tectonic significance of the early Paleozoic syenite granite from Jinchuan,Gansu Province. Earth Science Frontiers 28, 283-298(in Chinese with English abstract).

## Sheet: References for Figure 11
References for Figure 11
Jiao, J.G., Liu, H., Duan, J., Lu, H., Luo, D.Z., Qi, D., 2014. Hf Isotope Geochemical Characteristics and Magma Sourcesin Jinchuan Cu-Ni Sulfide Deposit. Journal of Earth Sciences and Environment 36, 58-67(in Chinese with English abstract).
Duan, J., Li, C.S., Qian, Z.Z., Jiao, J.G., 2015. Geochronological and geochemical constraints on the petrogenesis and tectonic significance of Paleozoic dolerite dykes in the southern margin of Alxa Block, North China Craton. Journal of Asian Earth Sciences 111, 244-253.
Gong, J.H., Zhang, J.X., Wang, Z.Q., Yu, S.Y., 2016. Origin of the Alxa Block, western China: New evidence from zircon U–Pb geochronology and Hf isotopes of the Longshoushan Complex[J].Gondwana Research 36, 359-375.
Zeng, R.Y., Lai, J.Q., Mao, X.C., Li, B., Ju, P.G., Tao, S.L., 2016. Geochemistry, zircon U-Pb dating and Hf isotopies composition of Paleozoic granitoids in Jinchuan, NW China: Constraints on their petrogenesis, source characteristics and tectonic implication. Journal of Asian Earth Sciences 121, 20-33.
Zeng, R,Y., Lai, J.Q., Mao, X.C.,Li, B., Zhang, J.D., Bayless, R.C., Yang, L.Z., 2018. Paleoproterozoic Multiple Tectonothermal Events in the Longshoushan Area, Western North China Craton and Their Geological Implication: Evidence from Geochemistry, Zircon U–Pb Geochronology and Hf Isotopes. Minerals, 8, 361.
Zhang, L.Q., 2019. Post-collisional magmatism and geodynamic process from the North Qilian orogen to Southern margin of the Alxa block.Wuhan, NW China. China University of Geosciences(in Chinese with English abstract).
Liu, W.H., Spier, C., Niu, Y.B., Liu, X.D., Yan, Jie., Wang, K.X., Pan, J.Y., 2021. Magma mixing in the genesis of the Qingshanbao granitoids in the Longshoushan area: Implications for the tectonic evolution of the North Qilian orogenic belt, NW China. Geological Journal ,56.
Zeng, R.Y., Lai, J.Q., Mao, X.C., Yan, J., Zhang, C.G., Xiao, W.Z., 2021. Geochemistry and zircon ages of the Yushigou diabase in the Longshoushan area, Alxa Block: implications for crust-mantle interaction and tectonic evolution. Geological Magazine 158.
Zhu, Q.L.,Guo, Z.F.,Wang, S.Y., Chen, J.Y., Qiu, R.G., Zhou, S., 2012. Formation age and geological environment of monzonitic granite from Qingshanpu pluton on the eastern margin of Longshou, Gansu[J]. IOP Conference Series: Earth and Environmental Science 804.
Guan, Y.H., Zeng, R.Y., Lai.J.Q., Mao, X.C., Su, H., 2023. Late Paleoproterozoic Metamorphic Deep Melting Event in the Longshoushan Area of Alxa and Its Geological Significance. Earth Science 48, 4034-4052(in Chinese with English abstract).

## Sheet: References for Figure 13
References for Figure 13
Yabulai-Nuoergong-Honggueryulin and Zongnaishan-shalazhashan zone
Liu, Q.，Zhao, G.C.，Sun, M.，Han, Y.G.，Eizenhofer P.R.，Hou, W.Z.，Zhang, X.R.，Zhu, Y.L.，Wang, B.，Liu, D.X., Xu, B., 2016b. Early Paleozoic subduction processes of the Paleo-Asian Ocean: Insights from geochronology and geochemistry of Paleozoic plutons in the Alxa Terrane. Lithos 262, 546-560.
Geng, Y.S., Zhou, X.W., 2012. Early Permian magmatic events in the Alxa metamorphic basement: evidence from geochronology. Acta Petrologica Sinica 28, 2667-2685(in Chinese with English abstract).
Li, J., 2012. Characteristics and Tectonic Significance of Late Paleozoic Intrusive RocksAlong the Yabrai-Bayn Noel of Alxa, Inner Mongolia. China University of Geosciences, Beijing(in Chinese with English abstract).
Dan, W., Li, X.H., Wang, Q., Tang G.J., Liu, Y., 2014. An Early Permian (ca.280Ma) silicic igneous province in the Alxa Block, NW China: A magmatic flare-up triggered by a mantle-plume? Lithos 204, 144-158.
Li, J.J., 2006. Regional Metallogenic System of Alashan Block in Inner Mongolia Autonomous Region. China University of Geosciences, Beijing(in Chinese with English abstract).
Ren, K.X., Yan, G.H., Mu, B.L., Xu, B.L., Tong, Y., Chen, T.L., Cai, J.H., Zhang, R.H., Chu,Z.Y., Qiu, J., 2005. Rb-Sr age and geological implication of the alxa alkaline-rich intrusive rocks, Western Inner Mongolia. Acta Scientiarum Naturalium Universitatis Pekinensis 41, 203-21(in Chinese with English abstract)1.
Shi, X.J., 2012. The Geochronology, Geochemistry and Petrogenesis of Granitoid in Qinggele Area, Northern Alxa. Master Dissertation, Beijing, China University of,Geosciences(in Chinese with English abstract).
Shi, X.J., Tong, Y., Wang, T., Zhang, J.J., Zhang, Z.C., Zhang, L., Guo, L., Zeng, T., Geng, J.Z., 2012. LA-ICP-MS zircon U-Pb age and geochemistry of the Early Permian Halinudeng granite in northern Alxa area, western Inner Mongolia. Geological Bulletin of China 31, 662-670(in Chinese with English abstract).
Zhang, L., Shi, X.J., Zhang, J.J., Yang, Q.D., Tong, Y., Wang, T., 2013b. LA-ICP-MS zircon U-Pb age and geochemical characteristics of the Taohaotuoxiquan gabbro in northern Alxa, Inner Mongolia. Geological Bulletin of China 32, 1536-1547.
Feng, J.Y., Xiao, W.J., Windley, B., Han, C.M., Wan, B., Zhang, G.E., Ao, S.J., Zhang, G.Y., Lin, L., 2013. Field geology, geochronology and geochemistry of mafic–ultramafic rocks from Alxa, China: Implications for Late Permian accretionary tectonics in the southern Altaids. Journal of Asian Earth Sciences 78,114-142.
Li, J.J., Zhai, Y.S., Yang, Y.Q., Wang, Y.B., Li, C.D., Cui, L.W., Zhou, H.Y., Liu, X.Y., Liu, X.X., Li, S., 2010a. Re-discussion on the metallogenic age of Zhulazaga gold deposit in Alashan Area, Inner Mongolia: evidence from zircon U-Pb SHRIMP age. Earth Science Fron-tiers 17, 178-184(in Chinese with English abstract).
Wu, K.L., 2011. Geochemical Characteristics and Tectonic Setting of Late Varisian Period in Alashan Block. Chang'an University Xian(in Chinese with English abstract).
Dan, W., Li, X.H., Wang, Q., Wang, X.C., Wyman, D.A., Liu, Yu., 2016. Phanerozoic amalgamation of the Alxa Block and North China Craton: Evidence from Paleozoic granitoids, U-Pb geochronology and Sr-Nd-Pb-Hf-O isotope geochemistry[J]. Gondwana Research 32, 105-121.
Wang, X.J., 2012. The geochemical characters and its tectonic implications of ophiolites in Alxa area, Inner Mongolia. China University of Geosciences, Beijing(in Chinese with English abstract).
Xu, L., X, Q.X., 2015. LA-ICP-MS Zircon U-Pb Age and Geochemical Characteristics of the Bayannuorigong Quartz Diorite in Alxa,Inner Mongolia.Xinjiang Geology 33, 529-536(in Chinese with English abstract).
Ye, K., Zhang, L., Wang T., S, X.J., Zhang,, J.j., Liu, C., 2016. Geochronology, geochemistry and zircon Hf isotope of the Permian intermediateacid ianeous rocks from the Yabulai Mountain in western Alxa, Inner Mongolia, and their tectonic implications. Acta Petrologica et Mineralogica 35, 901-928(in Chinese with English abstract).
Bao, C., Cheng, Y.L., Li, D.P., 2012. Discovery of the Late Permian volcanics in the Zhulazhagamaodao, northern margin of the Alxa Block. Earth Science Frontiers 19, 156-163(in Chinese with English abstract).
Xie F.Q., 2014. Study of granites rock mass of Zongnaishan、Shalaza and Bavinnuoeroong Master Dissertation. China University of Geoscience, Beiting(in Chinese with English abstract).
Xu, L., Xiao J., 2015. Zircon U-Pb Age and Geochemical Characteristics of Late Permian Volcanic Rocks in Alashan, Inner Mongolia. Western Resources 64, 107-111(in Chinese with English abstract).
Xiao, J., S, P., Xu, L., 2015. LA-ICP-MS zircon U-Pb ages, geochemical characteristics, and genesis of early Permian gabbros in the Norgon area of northern Alxa. Western Resources 64, 107-111(in Chinese with English abstract).
Liu, Q., Zhao, G.C., Sun, M., Han, Y.G., Eizenhofer, P.R., Hou, W.Z., Zhang, X.R., Zhu, Y.L., Wang, B., Liu, D.X., Xu, B., 2017b. Timing of the final closure of the Paleo-Asian Ocean in the Alxa Terrane: constraints from geochronology and geochemistry of Late Carboniferous to Permian gabbros and diorites. Lithos 275-275, 19-30.
Zhang, J.J., 2015. Etroeresis of the Perman grantoids from the northe Ake Blok and ther oeodynamic molicaions Docora Dissertaton. China Unversity of Geoscen, Beijing(in Chinese with English abstract).
Zheng, R.G.,Wu, T.R., Zhang, W., Xu, C.,Meng, Q.P., Zhang, Z.Y., 2014. Late Paleozoic subduction system in the northern margin of the Alxa block,Altaids:Geochronological and geochemical evidences from ophiolites. Gondwana Research 25, 842-858.
Zhang, J.J.,Wang, T., Castro, A., Zhang, L., Shi, X.J.,T, Y., Zhang, Z.C., Guo, Lei.,Yang, Q.D., Maria, I.L., 2016. Multiple Mixing and Hybridization from Magma Source to Final Emplacement in the Permian Yamatu Pluton, the Northern Alxa Block, China. Journal of Petrology 57.
Liu, Q.，Zhao, G.C.，Han, Y.G.，Eizenhofer P.R.，Hou, W.Z.，Zhang, X.R.，Zhu, Y.L.，Wang, B.，Liu, D.X., Xu, B., 2017b. Geochronology and geochemistry of Permian to Early Triassic granitoids in the Alxa Terrane: Constraints on the final closure of the Paleo-Asian Ocean. Lithospher.
Xu, L., 2015. Geochemical characteristics and tectonic significance of Caled-Onian-Indosinian Intrusive rock in Nuoergong, Inner Mongolia. Chengdu University of Technology(in Chinese with English abstract).
Li, C., 2018. Study on the Characteristics of Early Permian Intrusive Rocks in the Three Wells Area of Alxa Left Banner, Inner Mongolia. China University of Geosciences, Beijing(in Chinese with English abstract).
Wang, K.L., Zhang, J.X., Zhang, X.M., 2020. Magma mixing origin of the mafic microgranular enclaves from the Yabulai pluton in the western part of northern Alxa Block. Geological Review 66, 13-34(in Chinese with English abstract).
Wang, Z.Z., Han, B.F.,Feng, L.X., Liu, B., 2015. Geochronology，geochemistry and origins of the Paleozoic-Triassic plutons in the Langshan area，western Inner Mongolia，China. Journal of Asian Earth Sciences 97, 337-351.
Wang, Z.Z., Han, B.F.,Feng, L.X., Liu, B., Zheng, B., Kong, L.J., 2016b. Tectonic attribution of the Langshan area in western Inner Mongolia and implications for the Neoarchean-Paleoproterozoic evolution of the Western North China Craton: Evidence from LA-ICP-MS zircon U-Pb dating of the Langshan basement. Lithos 261, 278-295.
Tian, J., Teng, X.J., Liu, Y., 2020. U-Pb age and geochemical characteristics of quartz diorite in Early Carboniferous from Langshan area ofInner Mongolia, and its implication for subduction of Paleo-Asian Ocean. Geological Bulletin of China 39, 1035-1045(in Chinese with English abstract).
Tian, J., Teng, X.J., Liu, Y., Teng, F., Guo, S., He, P., Wang, W,L., 2020.. The chronology, geochemistry of the Early Permian granodiorite in Langshan area,lnner Mongolia and its tectonic setting. Geology in China 47, 767-781(in Chinese with English abstract).
Zhang, Y., Sun, L.X., Zhang, T.F., Sun, Y.W., Zhang, Q., Li, Y.F., Yang, Z,L., Liu, W.G., 2020. Geochronology, Geochemistry and Sr-Nd-Hf lsotopic Compositions of the Wuhua Gabbros in Langshan.lnner Mongolia: Constraints for Mantle Sources and Petrogenesis. Geoscience 34, 450-465(in Chinese with English abstract).
Zhang, J., Li, J.Y., Xiao, W.X., Wang, Y.N., Qi, W.H., 2013. Kinematics and geochronology of multistage ductile deformation along the eastern Alxa block, NW China: New constraints on the relationship between the North China Plate and the Alxa block[J].Journal of Structural Geology 57, 38-57.
Ran, H., Zhang, W.J., Liu, Z.B., 2012. Geochemical characteristics and LA-ICP-MS zircon U-Pb dating of the Late Permian monzogranite in Hanggale, Alax Right Banner,Inner Mongolia. Geological Bulletin of China 31, 1565-1575(in Chinese with English abstract). .
Liu, Z.B., Zhang, W.J., 2014. Geochemical Characteristics and LA-ICP-MS Zircon U-Pb Dating of the Late Permian Diorite in Hanggale, Alax Right Banner Inner Mongolia. Northwestern Geology 47, 84-95(in Chinese with English abstract). .
Liu, Z.B., Zhang, W.J., 2014. Geochemical characteristics and LA-ICP-MS zircon U-b dating of the Late Permian granodiorite inHanggale,Alax Right Banner,lnner Mongolia.Geological Review 60, 409-426(in Chinese with English abstract).
Zhang, Z.P., Liu, G., Xu, C., Meng, Q.T., Guo, C., 2016. Geochemical Characteristics and LA-ICP-MS Zircon U-Pb Dating of the Late Permian Granites in the Tamusu Area of Alxa Right Bannerlnner Mongolia and Their lmplications. Geology and Exploration 52, 893-909(in Chinese with English abstract).
Yang, Q.D., Zhang, L., Wan, T., Shi, X.J., Zhang, J.J., Tong, Y ., Guo, L., Geng, J.Z., 2014. Geochemistry and LA-ICP-MS zircon U-Pb age of Late Carboniferous Shalazhashan pluton on the northern margin of the Alxa Block, Inner Mongolia and their implications. Geological Bulletin of China 33, 776-787(in Chinese with English abstract).
Shi, X.J., Zhang, L., Wang, T., Xiao, X.C., Tong, Y ., Zhang, J.J., Geng, J.Z., Ye, K., 2014b. Geochronology and geochemistry of the intermediate-acid intrusive rocks from Zongnaishan area in northern Alxa, Inner Mongolia, and their tectonic implications. Acta Petrologica et Mineralogica 33, 989-1007(in Chinese with English abstract).
Zheng, R.G., Li, J.Y., Xioa, W.J., Liu, J.F., Wu, T.R., 2016. Discovery of Silurian Pluton in the Enger Us Region in the Northern Margin of Alxa Block. Acta Geologica Sinica 90, 1725-1736(in Chinese with English abstract). .
Xu, D.Z., Zhang, W.J., Zhou, H.T., Sun, Q.K., 2014. Characteristics, zircon dating and tectonic significance of the gabbros along the north-central segments ofthe Alxa Block,Inner Mongolia. Geological Bulletin of China 33, 661-671(in Chinese with English abstract).
Xie, F.Q., Wang, L.D., Li, Q., 2015. Zircon LA-ICP-MS Dating of Granites from the Southeastern Zongnai Mountain Alax and lts Geochemica Characteristics. Rock and Mineral Analysis 34, 375-382(in Chinese with English abstract).
Chen, G.C., Shi, J.Z., Jiang, T., Zhang, H.Y., Li, W., Wang, B.W., 2015. LA-ICP-MS zircon U-Pb dating and geochemistry of granitoids in Tamusu, Alxa Right Banner, Inner Mongolia. Geological Bulletin of China 34, 1884-1896(in Chinese with English abstract).
Zhang, W., Wu, T.R., Feng, C.J., 2013. Time constraints on the closure of ancient oceans on the northern edge of the Alxa block: evidence from the Uliji Huagang pluton . Chinese Science: Earth Scienc 43, 1299-1311(in Chinese with English abstract).
Shi, X.J., Wang, T., Zhang, L., Antonio, C., Xiao, X.C., Tong, Y., Zhang, J.J., Guo, L., Yang, Q.D., 2014. Timing, petrogenesis and tectonic setting of the Late Paleozoic gabbro–granodiorite–granite intrusions in the Shalazhashan of northern Alxa: Constraints on the southernmost boundary of the Central Asian Orogenic Belt. Lithos208-209, 158-177.
Lv, B.T., 2013. Geochemical characteristics and tectonic significance of Late Paleozoic intrusive rocks in the Tamusu Uliji area of Alxa, Inner Mongolia. China University of Geosciences, Beijing(in Chinese with English abstract).
Zheng, R.G., Wu, T.R., Zhang, W., 2013. Geochronology and geochemistry of the Yagan granite in the northern margin of the Alxa block: Constraints on the tectonic evolution of the southern Altaids. Acta Petrologica Sinica 29, 2665-2675(in Chinese with English abstract).
Beidashan
Zhou, X.C., Zhang, H.F.，Luo, B.J.，Pan, F.B., Zhang, S.S., Guo, L., 2016. Origin of high Sr /Y-type granitic magmatism in the southwestern of the Alxa Block,Northwest China. Lithos 256-257, 211-227.
Lai, X., Jiang, S., Qiu, X., Liu, Y ., Hu, P ., Zhang, W., 2007. 40Ar-39Ar age and geochemical features of Hercynian intermediate acidic rock in Beidashan Rock Belt, Aixa. Acta Geologica Sinica 81, 370-380(in Chinese with English abstract).
Zhang, W., Wang, J.R., Chen, W.F ., Zhai, X.W., Ma, J.L., 2014b, The Discovery of the Carboniferous Adakite and its Tectonic Implications in AlxaYouqi. Geological Journal of China Universities 20, 378-387(in Chinese with English abstract).
Chen, W., Zhou, W.P., Chen, K.X., Liu, M.W., Wan,g T., Fang, M., He, H.Y., Zhang, B., 2013. Subduction related Early Permian granodiorite in Jinchangshan of Alashan, Inner Mongolia: Evidences from zircon U-Pb geochronology and geochemistry. Journal of Mineralogy and Petrology 33, 53-60(in Chinese with English abstract).
Gan, D,B., Zeng, R.Y., Su, H., Guan, Y.H., 2023. Geochronology, geochemistry and geological significance of the Early Carboniferous granite porphyry from the Beidashan area, Alxa block. Chinese Journal of Geology(Scientia Geologica Sinica) 58, 556-579(in Chinese with English abstract).
Gong, J.H., Zhang, J.X., Wang, Z.G., Yu, S.Y., Wang, D.S., Zhang, H., 2018. Zircon U-Pb Dating, Hf lsotopic and Geochemical Characteristics of Two Suites of Gabbros in the BeidashanRegion, Western Alxa Block:lts lmplications for Evolution of the Central Asian Orogenic Belt. Acta Geologica Sinica 92, 1369-1388(in Chinese with English abstract).
Lei, Y.J., Zhang, L., Wang, M.M., Zhang, J.J., Sh,i X.J., Liu, C., 2021. Geochemistry, age and zircon Hf isotope characteristics for the Late Paleozoic intrusive rocks in Ubud area of Beidashan, Alxa and their significances. Chinese Journal of Geology(Scientia Geologica Sinica) 56, 182-209(in Chinese with English abstract).
Pan, X.F., 2019. Petrogenesis and tectonic significance of the Tebai basic ultrabasic rock mass in the northern mountainous area of the southern edge of the Alxa block . Chang'an University(in Chinese with English abstract).
Ma, Z.M., 2019. Petrogenesis and Geological Significance of the Lower Salt Beach Rock Mass in the North Dashan Area on the Southern Edge of the Alxa Block. Chang'an University(in Chinese with English abstract).
Leng, X., 2020. Late Paleozoic magmatic activity and tectonic significance in the Beidashan area of the Alxa block. Chang'an University(in Chinese with English abstract).
Zhou, X.C. 2016. Petrogenesis and Geodynamic Processes of the Paleozoic Magmatism in the Southwestern of the Alxa Block. PhD Thesis, China University of Geosciences, Wuhan(in Chinese with English abstract).
Yang, X., Li, Y.K., Wang, A.J., 2019. Closure time limit of the back-arc basin in the southwest of the Mongolian Ocean:constraints fromgeochemistry and zircon dating of rocks in the southern Alxa block.Acta Geologica Sinica 93, 1639-1654(in Chinese with English abstract).
Su, Q.Y., Duanmu, H.S., 2012 Geochemical characrterstics of quartz-diorte n Kuhewul Righ-Baer Axa and its geoloica sionicance Buletin of Mineralogy. Petro0loy and Geochemistry 31, 146-151(in Chinese with English abstract).
Lu, H., 2014. A Study on the Petrogenesis and Metallogenic Characteristics of the Yejili Magnesium Iron Ultra Magnesium Iron Rock Mass in Beida Mountain, Gansu Province. Chang'an University(in Chinese with English abstract).
Gu, G.L., 2012.The Prelminary Studes on the 0rion and tectonic Seting of Eary Mesozoic Granites in the Southwest Marin of Axa Masters Thesis. LanZhou University(in Chinese with English abstract).
Jjiao, J.G., Ma, Z.M., Lu, H., Gao,D., Zhang, G.P., Shao,L.Q., 2017. Zircon U-Pb ages of the Yejili mafic ultramafic pluton on the southern edge of the Alxa block and its geological significance. Geotectonica et Metallogenia 5, 950-959.
Longshoushan
Gao, Y., Zhao, R.Y., Wang, G., Nie, L., 2017. Geochemical characteristics and geological implication of the Jiling diabase in Gansu province. Geology and Resources 26, 505-14(in Chinese with English abstract).
Zhang, L.Q., Zhang, H.F., Hawkesworth, C., Luo, B.J., Yang, H., 2021. Mafic rocks from the southern Alxa block of Northwest China and its geodynamic evolution in the Paleozoic. Journal of the Geological Society 178.
Zhang, J.M., Zhao, R.Y., Wang, G., Nie, L., 2017. Thegeological characteristics and significances of A-type porphyritic granite in the Jiling uranium deposit in the Longshou mountains,Gansu Province.Bulletin of Mineralogy,Petrology and Geochemistry 36, 813-823(in Chinese with English abstract).
He, J.J., Shao, D.,Wang, G., Chen, Y.J., Li, T.S., 2020. Zircon U-Pb dating age,geochemical characteristics and geological significance of Qingshanbu granodiorite in Longshou Mountain area,Gansu. Mineral Resources and Geolog 36, 596-606(in Chinese with English abstract).
Chen, Y.J., Zhao, R.Y., Wang, G., Rong, X., Li, T., 2020. Geochronology, Geochemical Characteristics and Significances of Quartz Monzonite in Niujiaogou,Longshoushan,Gansu. Journal of East China University of Technology(Natural Science) 43, 21-29(in Chinese with English abstract).
Zhao, R.Y., Wang, B., Chen, Y.C., Chen, Y.J., Rong, X., Wang, G., Li, T., 2018. On Potassium-sodium Mixed Metasomatism of the Niujiaogou Uranium Occurrence in Longshou Mountain, Gansu Province. Acta Geologica Sinica 92, 2469-2484(in Chinese with English abstract).
Zhu, Q.L.,Guo, Z.F.,Wang, S.Y., Chen, J.Y., Qiu, R.G., Zhou, S., 2012. Formation age and geological environment of monzonitic granite from Qingshanpu pluton on the eastern margin of Longshou, Gansu[J]. IOP Conference Series: Earth and Environmental Science 804.
Liu, W.H., Spier, C., Niu, Y.B., Liu, X.D., Yan, Jie., Wang, K.X., Pan, J.Y., 2021. Magma mixing in the genesis of the Qingshanbao granitoids in the Longshoushan area: Implications for the tectonic evolution of the North Qilian orogenic belt, NW China. Geological Journal ,56.
Wang. K.X., Yu, C.D., Yan, J.,Liu, X.D., Liu, W.H., Pan, J.Y., 2019. Petrogenesis of earlySilurian granitoids in the Longshoushan area and their implications for the extensional environment of the North Qilian Orogenic Belt, China, Lithos 342-343, 152-174.
Liu, W.H., Pan, J.Y., Liu, X.D., Wang, K.X., Wang, G., X, P., 2019. Petrogenesis and tectonic implication of QingShanBao pluton in Longshoushan GanSu: Constraints from elemental geochemistry, zircon U-Pb age, and Sr-Nd isotopes. Mineralogy and Petrology 39, 26-40.
Zhang, L.Q., Zhang, H.F., Hawkesworth, C., Luo, B.J., Yang, H., Xu, W., Guo, L., Pan, F., Gao, Z., Tao, L., 2019. Sediment contribution in post-collisional high Ba-Sr magmatism:Evidence from the Xijing pluton in the Alxa block, NW China. Gondwana Research 69, 177-192.
Zeng, R.Y., Lai, J.Q., Mao, X.C., Bin, L., Ju, P.J., Tao, S.L., 2016. Geochemistry, zircon U–Pb dating and Hf isotopies composition of Paleozoic granitoids in Jinchuan, NW China: Constraints on their petrogenesis, source characteristics and tectonic implication. Journal of Asian Earth Sciences 121, 20-33.
Tang, L., 2015. Granites’characteristics and zircon LA-ICP-MS U-Pb dating of Jiling area in Longshoushan, Gansu Province. Master: East China Institute of Technology(in Chinese with English abstract)..
Chen, Y.J., Wang, W., Wang, G., Yang, K., He, J.J., Li, T., 2022. Characteristics of Diorite from the Qingshanbao Pluton and Their Relationship with UraniumMineralization in the Longshoushan Metallogenic Belt, Gansu Province. Geology and Exploration 58, 501-513(in Chinese with English abstract)..
Zhang, Z.Q., Wang, K.X., Wang, G., Liu, X.D., Liu, W.H., Wu, B., 2018. Petrogenesis and tectonic significances of the Paleozoic Jiling Syenite in the Mountain Longshou area, Gansu province. Geological Review 64,1017-29(in Chinese with English abstract)..
Chen, Y.J., Wang, G., Zhao, R.Y., Yang, K.R., Xiao, Tao., 2021. Zircon U-Pb Age and Geological Significance of Diorite Porphyrite From East Longshoushan, Gansu CHEN Yuniie. Uranium Geology 37, 38-50+111(in Chinese with English abstract)..
Zhang, X.X.,Su, S.G., Liu, M.Y.,Wang, W.Z., 2020. Characteristics and tectonic significance of the early Paleozoic syenite granite from Jinchuan,Gansu Province. Earth Science Frontiers 28, 283-298(in Chinese with English abstract).
Duan, J., Li, C.S., Qian, Z.Z., Jiao, J.G., 2015. Geochronological and geochemical constraints on the petrogenesis and tectonic significance of Paleozoic dolerite dykes in the southern margin of Alxa Block, North China Craton. Journal of Asian Earth Sciences 111, 244-253.
Chen, Y.J., Wang, G., Wang, W., He, J.j., Li, X.C., Zhang, C., Guo, B.J., 2022. Geological Characteristics and Significance of Middle-coarse Grain Granites in Jiling Area ofLongshoushan.Uranium Geology 38, 1111-1121(in Chinese with English abstract).
Duan, J., Qian, Z.Z., Jiao, J.G., Genesis and tectonic significance of the Xijing mafic rock mass in the Longshoushan rock belt, Gansu. Journal of Jilin University (Earth Science Edition) 45, 832-846(in Chinese with English abstract).
Wang, Z.Z.，Chen, X.H.，Shao, Z.G., Li, B.，Ding, W.C.，Zhang, Y.P.，Wang, Y.C.，Zhang, Y.Y., Xu, S.L.，Qin, X., 2020. Petrogenesis of the Late Silurian-Early Devonian granites in the Longshoushan-Helishan area, Gansu Province,and its tectonic implications for the Early Paleozoic evolution of the southwestern Alxa Block. Acta Geologica Sinica 94, 2243-2261(in Chinese with English abstract).
Leng, T.C., Liu, W.H., Wang, W., Yu, C.D., Liu, X.D., Li, Y.X., 2021.Discussion on geochemical characteristics and genesis of Hongshiquan syenite in Longshoushan area gansu province. Mineralogy and Petrology 41, 72-83(in Chinese with English abstract).
Zeng, R.Y., Lai, J.Q., Mao, X.C., Yan, J., Zhang, C.G., Xiao, W.Z., 2021. Geochemistry and zircon ages of the Yushigou diabase in the Longshoushan area, Alxa Block: implications for crust-mantle interaction and tectonic evolution. Geological Magazine 158.
Zeng, R.Y., Lai, J.Q., Mao, X.C., Xiao, W.Z., Yan, J., Zhang,C.D., Hu, J.X., An, Q.X., 2020. Petrogenesis and tectonic significance of the Early Devonian lamprophyres and diorites in the Alxa Block, NW China. Chemie der Erde-Geochemistry.
Hu, N.G., Xu, A.D., Yang, J.X., 2005. Characteristics and tectonic environment of Zhigoumen pluton in Longshoushan area. Earth Sci. Environ 27, 5-11(in Chinese with English abstract).
Zeng, R.Y., Lai, J.Q., Mao, X.C., Li, B., Ju, P.G., Tao, S.L., 2016. Geochemistry, zircon U-Pb dating and Hf isotopies composition of Paleozoic granitoids in Jinchuan, NW China: Constraints on their petrogenesis, source characteristics and tectonic implication. Journal of Asian Earth Sciences 121, 20-33.
Xue, S., Ling, M.X., Liu, Y.L., Zhang, H., Sun, W.D., 2017. The genesis of early Carboniferous adakitic rocks at the southern margin of the Alxa Block, North China[J].Lithos: An International Journal of Mineralogy, Petrology, and Geochemistry 278-281, 181-194.
Zhang, L.Q., 2019. Post-collisional magmatism and geodynamic process from the North Qilian orogen to Southern margin of the Alxa block.Wuhan, NW China. China University of Geosciences(in Chinese with English abstract).
Jiao, J.G., Ji, S.J., Ru, H.C., Zhang, G.P., Ning, Q.F., Shao, L., 2017. Petrology, gechemisty and chronology study of the Xiaokouzi maftc-ultramafic intrusion n the eastern section of Longshou Mountains, Gansu.Acta Geologica Sinica 91, 736-747(in Chinese with English abstract).
Hexi Corridor
Xiong, Z.L., Zhang, H.F., Zhang, J., 2012. Petrogenesis and tectonic implications of the Maozangsi and Huangyanghe granitic intrusions in Lenglongling area, the eastern part of North Qilian Mountain, NW China. Earth Science Frontiers 19, 214-27(in Chinese with English abstract).
Yu, S.Y.，Zhang, J.X.，Qin, H.P.，Sun, D.Y., Zhao, X.L., Feng, C., Li, Y.S., 2015. Petrogenesis of the early Paleozoic low-Mg and high-Mg adakitic rocks in the North Qilian orogenic belt, NW China: Implications for transition from crustal thickening to extension thinning. Journal of Asian Earth Sciences 107, 122-139.
Wei, Q.Q., Hao, J.B., Lu, J.L., Zhao, Y., Zhao, X., Shi, H., 2013. LA-MC-ICP-MS zircon U–Pb dating of Hexipu granite and its geological implications. Bull. Mineral., Petrol. Geochem 32, 729-735(in Chinese with English abstract).
Qin, H.P., 2012. Petrology of early Paleozoic granites and their relation to tectonic evolution of orogen in the North Qilian Orogenic Belt. Chinese Academy of Geological Sciences(in Chinese with English abstract).
Chen, S.，Niu, Y.L.，Sun, W.L.，Zhang, Y., Li, J.Y., Guo, P.Y., Sun, P., 2015. On the origin of mafic magmatic enclaves (MMEs) in syn-collisional granitoids: evidence from the Baojishan pluton in the North Qilian Orogen, China. .Mineralogy and Petrology 109, 577-596.
Chen, S.，Niu, Y.L.，Xue, Q., 2018. Syn-collisional felsic magmatism and continental crust growth: A case study from the North Qilian Orogenic Belt at the northern margin of the Tibetan Plateau. Lithos 308-309, 53-64.
Huang, Z.B., Zheng, J.P., Li, B.H., Dong, X.Y., Fu, T.Y., Xu, L. Gao, K.L., 2018. U-Pb ages, Hf isotopic composition and geochemistry of alkaline complex from the Ganshaebo REE deposit in North Qilian Mountains, China. Acta Geologica Sinica 92, 2420-2436(in Chinese with English abstract).
Sun, B.L., Qian, Q., Zhang, J.X., 2017. Zircon U-Pb geochronology, Hf-O isotopes, whole-rock geochemistry of the Dafosi and Jinfosi granite plutons,Gansu Province and geological implications. Acta Petrologica Sinica 33, 3091-10(in Chinese with English abstract)8.
Zhang, H.R., Zhao, J.L., Yu, H.Y., 2019. Petrogenesis and Tectonic lmplications of the Laohushan Quartz Diorite from the Eastern Part ofNorth Qilian Orogen, NW China. Geological Journal of China Universities 25, 641-653(in Chinese with English abstract).
Song, S.G., Niu, Y.L., Su, L., 2013. Tectonics of the North Qilian orogen, NW China . Gondwana Research 23, 1378-1401.
North Qilian Block
Chen, Y.X.，Song, S.G.，Niu, Y.，Wei, C., 2014. Melting of continental crust during subduction initiation: A case study from the Chaidanuo peraluminous granite in the North Qilian suture zone. Geochimica et Cosmochimica Acta 132, 311-336.
Wu, C.L., Xu X.Y., Gao, Q.M., Li, X.M., Lei, M., Gao, Y.H., Frost, R.B., Wooden, J.L., 2010. Early Palaeozoic granitoid magmatism and tectonic evolution in North Qilian, NW China. Acta Petrologica Sinica 26, 1027-44(in Chinese with English abstract).
Wu, C.L., Gao, Y.H.，Frost, R.B., Wooden, J.L., Robinson, P.T., Chen, Q.L., Lei, M., 2015. An early Palaeozoic double-subduction model for the North Qilian oceanic plate: evidence from zircon SHRIMP dating of granites. .International Geology Review 53, 157-181.
Wu, C.L., Yang, J.S., Yang, H.Y., Wooden, J., Shi, R.D., Chen, S.Y., Zheng, Q.G., 2004. Dating of two types of granite from north Qilian, China. ActaPetrologica Sinica 20, 425-432(in Chinese with English abstract).
Yu, S.Y.，Zhang, J.X.，Qin, H.P.,，Sun, D.Y., Zhao, X.L., Feng, C., Li, Y.S., 2015. Petrogenesis of the early Paleozoic low-Mg and high-Mg adakitic rocks in the North Qilian orogenic belt, NW China: Implications for transition from crustal thickening to extension thinning. Journal of Asian Earth Sciences 107, 122-139.
Qin, H.P., Wu, C.L., Wang, C.S., Li, X., Lei, M., Liu, C.H., Li, M.Z., 2014. LA-ICP-MS zircon U-Pb dating and geochemical characteristics of high Sr/Y-type granite from Xigela, eastern Qilian area. Acta Petrologica Sinica 30, 3759-3771(in Chinese with English abstract).
Qin, H.P., Wu. C.L., Wang, C.S., Lei, M., Liu, C.H., Li, M.Z., 2014. LA-ICP-MS zircon U-Pb geochronology and geochemical characteristical of Xiagucheng granite in north Qilian. Acta Geologica Sinica 88, 1832-1842(in Chinese with English abstract).
Chen, Y.，Xia, X.，Song, S., 2012. Petrogenesis of Aoyougou high-silica adakite in the North Qilian orogen, NW China: evidence for decompression melting of oceanic slab. Chinese science bulletin 57, 2289-2301.
Tseng, C.Y.，Yang, H.J.，Yang, H.Y.，Liu,D.Y., Wu, C.L., Cheng, C.K., Chen, C.H., Ker, C.M., 2009. Continuity of the North Qilian and North Qinling orogenic belts, Central Orogenic System of China: evidence from newly discovered Paleozoic adakitic rocks. Gondwana Research 16, 285-293.
Yang, X.Q.，Zhang, Z.H.，Jiang, Z.S.，Duan, S.G., 2018. Geochronology, petrogenesis and tectonic significance of Huashugou granitoids in north Qilian, NW China. Lithos314-315, 497-505.
Chen, S.，Niu, Y.L.，Li, J.Y.，Sun, W.L., Zhang, Y., Hu, Y., Shao, F.L., 2016. Syn-collisional adakitic granodiorites formed by fractional crystallization: Insights from their enclosed mafic magmatic enclaves (MMEs) in the Qumushan pluton, North Qilian Orogen at the northern margin of the Tibetan Plateau. Lithos 248-251, 455-468.
Xia, X.，Song, S.，Niu, Y., 2012. Tholeiite-boninite terrane in the North Qilian suture zone: Implications for subduction initiation and back-arc basin development. Chemical Geology 328, 259-277.
Wang, J.R., Wu, J.C., Jia, Z.L., 2008. Sujiashan high-Mg adakite in the eastern section of North Qilian Mountains: implications for geodynamics. Journal of Lanzhou University 44, 16-27(in Chinese with English abstract).
Zhao, G.B., Y ang, H.Q., Ren, H.N, Jia, J., Wang, Y .H., Li, J.C., Zhou, H., 2013. LA-ICP-MS zircon U-Pb ages of Heishishan granite bodies in north Qilian and their geological significance. Geological Bulletin of China 32, 1575-1583(in Chinese with English abstract).
Zhao, X.M., Zhang, Z.H., Liu, M., Li, Y .S., Guo, S.F., 2014. Zircon U-Pb geochronology, geochemistry and petrogenesis of the granites from the Xiaoliugou deposit in the western of the North Qilian. Acta Petrologica Sinica 30, 16-34(in Chinese with English abstract).
Wang, N., Wu, C.L., Lei, M., Chen, H.J., 2018. Petrogenesis and tectonic implications of the Early Paleozoic granites in the western segment of the North Qilian orogenic belt, China. Lithos, 89-107.
Wang, N., Wu, C.L., Lei, M., Chen, H.J., Li, M.Z., Zheng, W.H., 2017. Geochronology and petrogenesis of granite in Shibaocheng area from the North Qilian orogenic belt. Acta Petrologica Sinica 33, 3909-3924(in Chinese with English abstract).
Xia, X.H., Song, S.G., 2010. Forming age and tectono-petrogenises of the Jiugequan ophiolite in the North Qilian Mountain, NW China. Chinese Science Bulletin 55, 1899-1907.
Shi, R.D., Yang, J.S., Wu, C.L., Wooden, J., 2004. First SHRIMP dating of the formation of the Late Sinian Yushigou ophiolite, North Qilian Mountains. Acta Geol. Sinica 78, 649-665(in Chinese with English abstract).
Tseng, C.Y., Yang, H.Y., Wu, H.Q., Zuo, G.C., 2007. The silicate mineral inclusions in the chromian spinel from the Dongcaohe ophiolite, North Qilian Mountains, northwestern China: record of syntexis of lower oceanic crust. Canadian. Mineralogist 45, 793-808.
Meng, F.C., Zhang, J.X., Ker, C., Li, J.P., 2010. Constraints on the evolution of the North Qilian ocean basin: MOR-type and SSZ-type ophiolites from Dachadaban. Acta Petrol. Mineral. 29, 453-466.
Xiang, Z.Q., Lu, S.N., Li, H.K., Li, H., Song, B., Zheng, J., 2007. SHRIMP U-Pb zircon age of gabbro in Aoyougou in the western segment of the North Qilian Mountains,China and its geological implications. Geol. Bull. China 26, 1686-1691(in Chinese with English abstract).
Gehrels, G.E., Yin, A., Wang, X.F., 2003. Magmatic history of the northeastern Tibetan Plateau. Journal of Geophysical Research-Solid Earth, 108, 2423
Fu, D., Kusky, T., Wilde, S.A., Polat, A., Huang, B., Zhou, Z., 2019. Early Paleozoic collision-related magmatism in the eastern North Qilian orogen, northern Tibet, A linkage between accretionary and collisional orogenesis. Geological Society of America Bulletin 131, 1031-1056.
Central Qilian Block
Zhang, L.L., Dai, S., Zhang, X., Zhang, R., Zhang, M.Z., Wang, L.B., Liu, H.J., 2013. Lithogeochemistry of Jijiaogou intrusive complex in the Danghenanshan area, South Qilian Mountain and its tectonic implications. Journal of Lanzhou University (Natural Sciences) 49, 732-740.
Wang, C., Li, R.S., Smithies, R.H., Li, M., Peng, Y., Chen, F.N., He, S.P., 2017. Early Paleozoic felsic magmatic evolution of the western Central Qilian belt, Northwestern China, and constraints on convergent margin processes. Gondwana Research 41, 301-324.
Cowgill, E., Yin, A., Harrison, T.M., Wang, X.F., 2003. Reconstruction of the Altyn Tagh fault based on U-Pb geochronology, Role of back thrusts, mantle sutures, and heterogeneous crustal strength in forming the Tibetan Plateau. Journal of Geophysical Research-Solid Earth, 108.
Luo, Z., Zhang, Z., Li, J., Feng, Z., Tang, W., 2015. Geochronology of two kinds of Paleozoic granitic plutons from Sangewatang in Subei, the western margin of Central-South Qilian and their geological implications. Acta Petrologica Sinica 31, 176-188.
Huang, Z.B., Zheng, J.P., Li, B.H., Wei, Z.J., Qi, W., Chen, X., 2015. Geochronology and geochemistry of Yemashan batholiths in western Central Qilian and its tectonic implications. Geology in China 42, 406-420.
Huang, Z.B., Zheng, J.P., Li, B.H., Wei, Z.J., Qi, W., Xu, Y.L., 2014. The discovery of Late Cambrian adakite in the western Central Qilian Mountain and its geological implications. Acta Petrologica et Mineralogica 33, 1008-1018.
Tung, K.A., Yang, H.Y., Yang, H.J., Smith, A., Liu, D., Zhang, J., Wu, C., Shau, Y.H., Weng, D.J., Tseng, C.Y., 2016. Magma sources and petrogenesis of the early-middle Paleozoic backarc granitoids from the central part of the Qilian block, NW China. Gondwana Research 38, 197-219

## Sheet: References for Figure 14
References for Figure 14
Zhang, L.Q., Zhang, H.F., Hawkesworth, C., Luo, B.J., Yang, H., 2021. Mafic rocks from the southern Alxa block of Northwest China and its geodynamic evolution in the Paleozoic. Journal of the Geological Society 178.
Liu, W.H., Spier, C., Niu, Y.B., Liu, X.D., Yan, Jie., Wang, K.X., Pan, J.Y., 2021. Magma mixing in the genesis of the Qingshanbao granitoids in the Longshoushan area: Implications for the tectonic evolution of the North Qilian orogenic belt, NW China. Geological Journal ,56.
Zhang, L.Q., 2019. Post-collisional magmatism and geodynamic process from the North Qilian orogen to Southern margin of the Alxa block.Wuhan, NW China. China University of Geosciences(in Chinese with English abstract).
Wang. K.X., Yu, C.D., Yan, J.,Liu, X.D., Liu, W.H., Pan, J.Y., 2019. Petrogenesis of earlySilurian granitoids in the Longshoushan area and their implications for the extensional environment of the North Qilian Orogenic Belt, China, Lithos 342-343, 152-174.
Chen, Y.J., Wang, W., Wang, G., Yang, K., He, J.J., Li, T., 2022. Characteristics of Diorite from the Qingshanbao Pluton and Their Relationship with UraniumMineralization in the Longshoushan Metallogenic Belt, Gansu Province. Geology and Exploration 58, 501-513(in Chinese with English abstract)..
Zhang, Z.Q., Wang, K.X., Wang, G., Liu, X.D., Liu, W.H., Wu, B., 2018. Petrogenesis and tectonic significances of the Paleozoic Jiling Syenite in the Mountain Longshou area, Gansu province. Geological Review 64,1017-29(in Chinese with English abstract)..
Duan, J., Li, C.S., Qian, Z.Z., Jiao, J.G., 2015. Geochronological and geochemical constraints on the petrogenesis and tectonic significance of Paleozoic dolerite dykes in the southern margin of Alxa Block, North China Craton. Journal of Asian Earth Sciences 111, 244-253.
Chen, Y.J., Wang, G., Zhao, R.Y., Yang, K.R., Xiao, Tao., 2021. Zircon U-Pb Age and Geological Significance of Diorite Porphyrite From East Longshoushan, Gansu CHEN Yuniie. Uranium Geology 37, 38-50+111(in Chinese with English abstract)..
Tang, L., 2015. Granites’characteristics and zircon LA-ICP-MS U-Pb dating of Jiling area in Longshoushan, Gansu Province. Master: East China Institute of Technology(in Chinese with English abstract)..
Zeng, R.Y., Lai, J.Q., Mao, X.C., Yan, J., Zhang, C.G., Xiao, W.Z., 2021. Geochemistry and zircon ages of the Yushigou diabase in the Longshoushan area, Alxa Block: implications for crust-mantle interaction and tectonic evolution. Geological Magazine 158.
