# Supplementary material for: Petrogenesis of Early Paleozoic I-type granitoids in the Longshoushan and implications for the tectonic affinity and evolution of the southwestern Alxa Block
Source: Copernicus journal article supplement (doi:10.5194/egusphere-2024-1145), 2024-06-26
Supplement: Supplementary file 6 [file Table S5.xls]

## Sheet: PlotDat7
Source sheet	Sheet2	0.3	0.282501	1	0.282504	4.82273e-08
Plot name	Average3	23.7	0.282501	2	0.282491	5.17104e-08
Plot Type	15			3	0.282512	5.03081e-08
1st free col	8			4	0.282498	4.93076e-08
Sigma Level	2			5	0.282499	5.70307e-08
Absolute Errs	FALSE			6	0.282482	5.51083e-08
Symbol Type	1			7	0.2825	5.72113e-08
Inverse Plot	FALSE			8	0.282492	5.55076e-08
Color Plot	TRUE			9	0.282518	5.08369e-08
3D plot	FALSE			10	0.282511	6.03745e-08
Linear	FALSE			11	0.282502	6.05333e-08
Data Range	B233:C263			12	0.282502	5.11917e-08
Filled Symbols	FALSE			13	0.282496	5.08433e-08
ConcAge	FALSE			14	0.282492	5.30795e-08
ConcSwap	FALSE			15	0.28251	6.23391e-08
1st Symbol-row	1			16	0.282506	5.5124e-08
				17	0.282507	5.68039e-08
				18	0.28251	5.32495e-08
				19	0.282507	5.09684e-08
				20	0.282505	5.41549e-08
				21	0.282496	5.22626e-08
				22	0.282488	5.46351e-08
				23	0.282496	5.46192e-08
				IsoLine	IsoLine	IsoLine	IsoLine

## Sheet: Sheet3
Table S5. Zircon Hf isotopic data
Sample	t/Ma	176Hf/177Hf	2σ	176Lu/177Hf	176Yb/177Hf	εHf（t）	2σ	TDM1(Ma)	TDM2(Ma)
Monzogranite
JC-20-9-03	440.8	0.282436	1.22419e-05	0.000914465	0.026673	-2.44168	0.432925	1150.33	1577.44
JC-20-9-04	440.8	0.282423	1.07826e-05	0.000530326	0.0143324	-2.78678	0.381317	1156.68	1599.35
JC-20-9-07	440.8	0.282617	1.20462e-05	0.00170961	0.0473676	3.71581	0.426004	916.561	1186.78
JC-20-9-12	440.8	0.282391	1.28358e-05	0.00101016	0.0306467	-4.07158	0.453928	1216.66	1680.51
JC-20-9-13	440.8	0.282425	1.15181e-05	0.00176853	0.0540216	-3.08374	0.407328	1192.71	1617.87
JC-20-9-14	440.8	0.282399	1.06537e-05	0.000827521	0.0232548	-3.74591	0.37676	1200.09	1659.96
JC-20-9-17	440.8	0.282308	1.31035e-05	0.00150443	0.0425004	-7.16471	0.463395	1350.81	1875.64
JC-20-9-19	440.8	0.282407	1.32048e-05	0.0015502	0.0465259	-3.65382	0.466978	1211.17	1653.97
JC-20-9-20	440.8	0.282402	1.07081e-05	0.00111491	0.0339084	-3.7138	0.378682	1204.62	1657.86
JC-20-9-21	440.8	0.282502	1.68316e-05	0.0020333	0.0631208	-0.432758	0.595237	1090.18	1450.02
JC-20-9-23	440.8	0.282392	1.81033e-05	0.00189586	0.0622774	-4.30658	0.640209	1244.86	1695.14
JC-20-9-24	440.8	0.282295	1.76189e-05	0.00227487	0.0673519	-7.82878	0.623076	1397.15	1917.23
JC-20-9-25	440.8	0.282406	1.16309e-05	0.00132178	0.0384385	-3.62813	0.411319	1205.44	1652.4
JC-20-9-26	440.8	0.282402	1.40385e-05	0.00222831	0.0676591	-4.02806	0.49646	1240.81	1677.46
JC-20-9-27	440.8	0.282392	1.31681e-05	0.0034842	0.105633	-4.74165	0.46568	1299.56	1722.17
K-feldspar granite
JC-20-19-01	439.4	0.282376	1.11457e-05	0.00122156	0.0357537	-4.7031	0.394157	1244.97	1719.3
JC-20-19-03	439.4	0.282092	1.07805e-05	0.00134162	0.0368057	-14.7802	0.381245	1648.04	2353.51
JC-20-19-06	825	0.281812	9.26835e-06	0.000595248	0.0168545	-16.07	0.327768	1999.13	2721.91
JC-20-19-08	439.4	0.282494	9.89148e-06	0.0011275	0.0318378	-0.494198	0.349804	1075.74	1452.99
JC-20-19-10	439.4	0.282379	1.06114e-05	0.001152	0.0329556	-4.56944	0.375263	1238.17	1710.87
JC-20-19-11	439.4	0.282155	1.01745e-05	0.00134457	0.0377872	-12.5411	0.359813	1559.4	2212.99
JC-20-19-12	439.4	0.282408	1.22932e-05	0.000960645	0.0267566	-3.48902	0.434741	1191.43	1642.62
JC-20-19-13	439.4	0.28241	9.52291e-06	0.000780226	0.0216887	-3.36872	0.33677	1183.11	1635.06
JC-20-19-16	439.4	0.282384	1.10117e-05	0.000917338	0.0257274	-4.32241	0.389421	1223.46	1695.32
JC-20-19-18	439.4	0.282392	1.12738e-05	0.00100905	0.0280502	-4.08156	0.398688	1215.84	1680.08
JC-20-19-23	439.4	0.282488	1.03359e-05	0.00170942	0.0465944	-0.857401	0.36552	1100.45	1475.91
JC-20-19-25	439.4	0.282187	1.10636e-05	0.00138572	0.0386887	-11.4192	0.391257	1516.07	2142.48
JC-20-19-27	439.4	0.282057	1.14971e-05	0.00214777	0.0613835	-16.2713	0.406586	1734.89	2446.43
