# Supplementary material for: Petrogenesis of Early Paleozoic I-type granitoids in the Longshoushan and implications for the tectonic affinity and evolution of the southwestern Alxa Block
Source: Copernicus journal article supplement (doi:10.5194/egusphere-2024-1145), 2024-06-26
Supplement: Supplementary file 7 [file Table S6.xls]

## Sheet: 制图和制表
Table S6 Calculated Crustal Thickness for Each Data Subset of the Longshoushan in southwestern margin of the Alxa Block
	Area of pluton	Age (Ma)	2σ (Ma)	median Sr/Y	stdev	crustal thickness (km) a	Uncertainty (km)	Highest Ce/Y	crustal thickness (km) b
	Jiling (Zhang et al., 2021)	446	6					3.29798	43.0984
	Xijing (Zhang et al., 2021 )	441	2					2.57233	38.6129
	Qingshanpu (Liu et al., 2021)	439	4.7	24.9767	17.4766	44.5563	2.35
	Xijing (Zhang et al., 2019)	438	4	36.2875	9.64501	52.5226	6.46
	Jiling (Wang et al., 2019)	435	3	30.8285	10.461	51.1381	3.18
	Qingshanpu (Chen et al., 2022)	427.8	3.1	35.7466	11.5017	49.8357	12.6
	Jiling (Zhang et al., 2018)	427.2	3.6	27.6976	5.9836	46.787	3.65
	Jinchang (Duan et al., 2015)	423.5	1.4					2.15151	35.3883
	Qingshanpu (Chen et al., 2021)	422.3	3.6	10.1346	5.58647	36.7191	2.61
	Jiling (Tang, 2015)	416	9.2	3.5175	3.00518	31.5174	1.34
	Jinchuan (Zeng et al., 2021)	414	9.1					2.66445	39.248
	Note. Stdev= standard deviation; a value corresponding to Sr/Y from intermediate-acid rocks; b value corresponding to Highest Ce/Y from basic-ultrabasic rock
